# Supplementary material for: Convenient tumor 3D spheroid arrays manufacturing via acoustic excited bubbles for in situ drug screening
Source: Royal Society of Chemistry journal article supplement (doi:10.1039/d2lc00973k), 2023-01-01
Supplement: d2lc00973k3.pdf [file d2lc00973k3.pdf]

## Electronic Supplementary Information

### Convenient tumor 3D spheroid arrays manufacturing via acoustic excited bubbles for in-situ drug screening

Jingjing Zheng,<sup>‡ab</sup> Xuejia Hu,<sup>‡c</sup> Xiaoqi Gao,<sup>ab</sup> Yantong Liu,<sup>ab</sup> Shukun Zhao,<sup>ab</sup> Longfei Chen,<sup>ab</sup> Guoqing He,<sup>ab</sup> Jingwei Zhang,<sup>d</sup> Lei Wei,<sup>e</sup> and Yi Yang<sup>\*ab</sup>

<sup>a</sup> School of Physics & Technology, Key Laboratory of Artificial Micro- and Nano- Structures of Ministry of Education, Department of Clinical Laboratory, Institute of Medicine and Physics, Renmin Hospital, Wuhan University, Wuhan 430072, China.

<sup>b</sup> Shenzhen Research Institute, Wuhan University, Shenzhen 518000, China.

<sup>c</sup> Department of Electronic Engineering, School of Electronic Science and Engineering, Xiamen University, Xiamen 361005, China.

<sup>d</sup> Department of Breast & Thyroid Surgery, Zhongnan Hospital of Wuhan University, Wuhan University, Wuhan 430071, China.

<sup>e</sup> School of Basic Medical Sciences, Zhongnan Hospital of Wuhan University, Wuhan University, Wuhan 430071, China.

<sup>‡</sup> These authors contributed equally: Jingjing Zheng, Xuejia Hu.

\*Correspondence and requests for materials should be addressed to Y. Yang. (Email: [yangyiys@whu.edu.cn](mailto:yangyiys@whu.edu.cn))

#### This PDF file includes:

Fig. S1 to S4

#### Other Supplementary Materials for this manuscript include the following:

Movie S1: Acoustic wave turns on the process of cell aggregation from the dispersed state into spheres (MP4).

Movie S2: Bright and fluorescent fields after cell sphere agglomeration stabilization (MP4).

## Figures

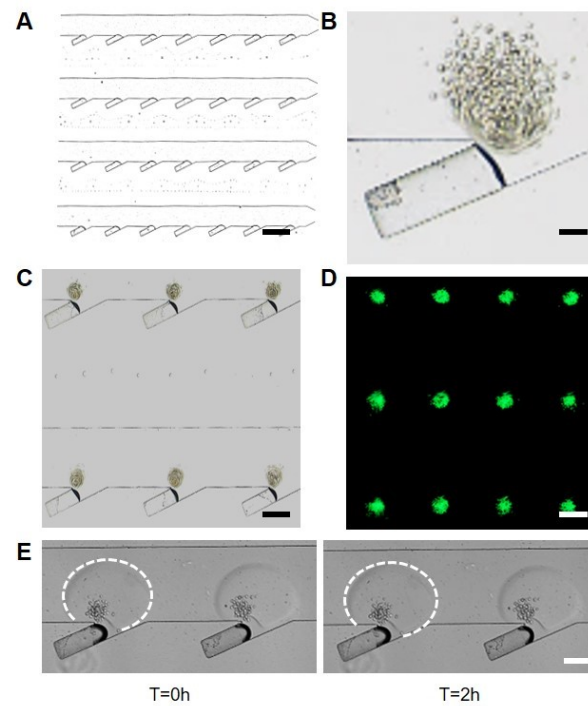

**Fig. S1.** (A) Bright-field image of bubble array. Scale bar is 500  $\mu\text{m}$ . (B) Bright-field image of a single acoustic bubble forming a cell spheroid. Scale bar is 50  $\mu\text{m}$ . (C) Formation of bright-field images of the cell spheroid. Scale bar is 250  $\mu\text{m}$ . (D) Fluorescence image of cell spheroid after curing. Scale bar is 300  $\mu\text{m}$ . (E) Changes in the volume of the hydrogel encapsulating the cells with time. Scale bar is 150  $\mu\text{m}$ .

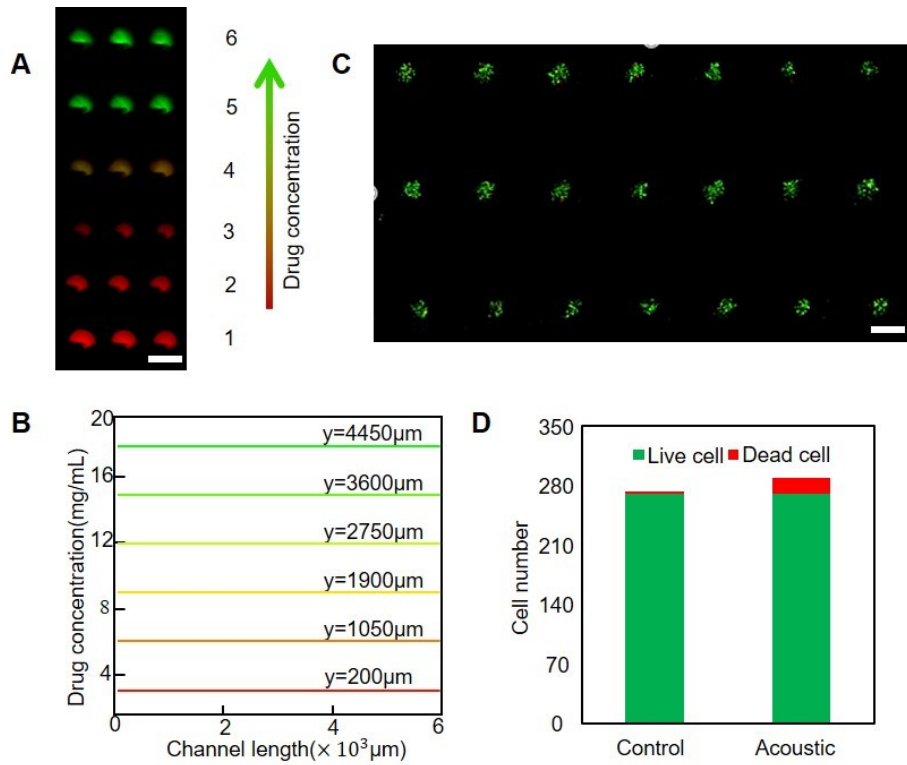

**Fig. S2.** (A) Bidirectional gradient distribution of drug/dye reflected in the hydrogel area array. Scale bar is  $600 \mu\text{m}$ . (B) Concentration distribution in each channel. (C) Cellular activity after acoustic and light curing, stained with FDA/PI. Scale bar is  $300 \mu\text{m}$ . (D) Number of live and dead cells before and after acoustic and light effects.

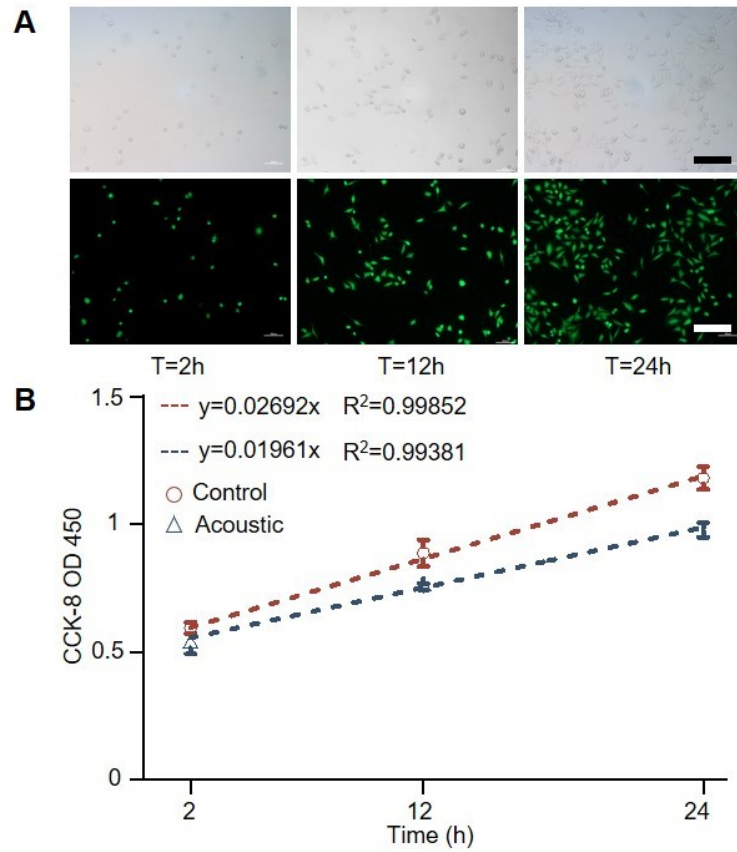

**Fig. S3.** (A) Value-added of cells over time after the action of collected acoustic bubbles. Scale bar is 200  $\mu\text{m}$ . (B) OD450 values of acoustic-treated and non-acoustic-treated cells were measured with CCK-8. A linear fit was made to the OD450 curve over time, with means and variances from four independent groups.

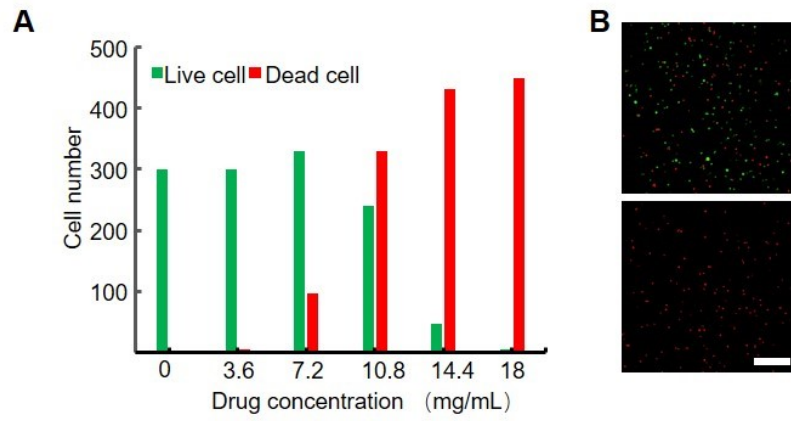

**Fig. S4.** (A) Number of live-dead cells in the cell spheroids array at each concentration. (B) the live-dead cells of single cells at 7.2 mg mL<sup>-1</sup> and 18 mg mL<sup>-1</sup> concentrations, respectively. Scale bar is 900  $\mu$ m.
